# Supplementary material for: Quantitative Loop-mediated Isothermal Amplification Detection of <em>Ustilaginoidea virens</em> Causing Rice False Smut
Source: Preprints.org preprint supplement (doi:10.20944/preprints202304.1259.v1), 2023-04-30
Supplement: Supplementary file 1 [file supplementary]

**Supplementary Figure S1.** Sensitivity validation of q-PCR detection system*.* The fluorescence signals in q-PCR detection assays were detected in the samples with DNA template of 2×104 spores/mL, 4×103 spores/mL, 8×102 spores/mL and 1.6×102 spores/mL within 60 min, while no signals were detected in sample with DNA template of 32 spores/mL and CK. The green line (horizontal) indicates fluorescence threshold. Fluorescence signals above this threshold
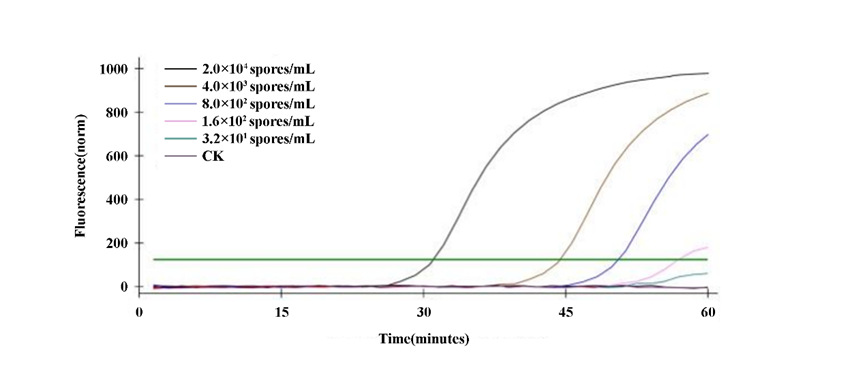
marked as a successful detection for *U. virens* inq-LAMP assays.
